# Supplementary material for: Exploring the Complex Network of Heme-Triggered Effects on the Blood Coagulation System
Source: MDPI journal article supplement (doi:10.3390/jcm11195975), 2022-10-10
Supplement: s1 [file s1]

## Supplementary figure

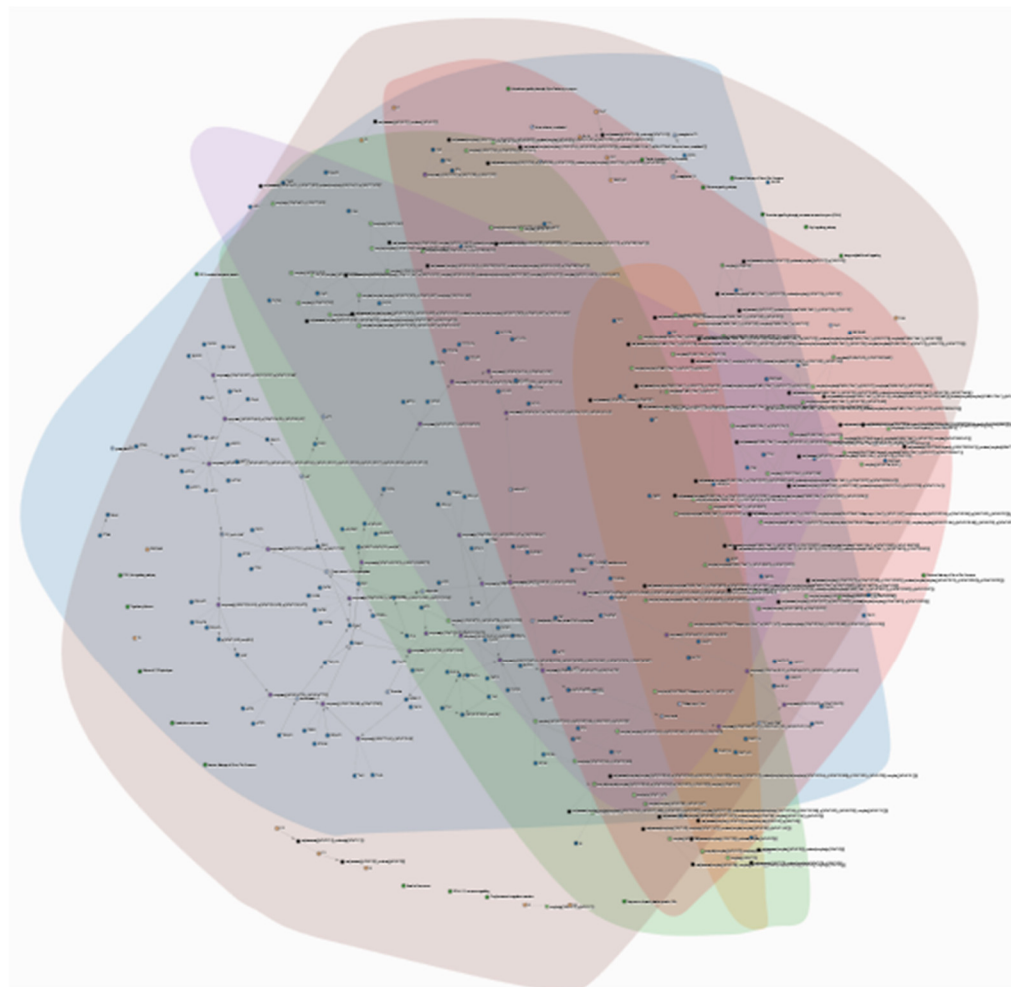

**Figure S1.** Overview of the extracted knowledge from the common pathway databases, involving pathways of platelet activation and of the coagulation cascade. The following pathways are included: HSA04611 (blue, “platelet activation”, KEGG), R-HAS-140834 (orange, “extrinsic pathway of fibrin clot formation”, Reactome), R-HSA-140837 (green, “intrinsic pathway of fibrin clot formation”, Reactome), R-HSA-140875 (red, “common pathway of fibrin clot formation”, Reactome), R-HSA-76009 (purple, “platelet aggregation/plug formation”, Reactome) and WP272 (brown, “blood clotting cascade”, WikiPathways).

## Supplementary table

**Table S1.** Evidence for heme relations in the platelet activation signaling pathways from additional literature screening.

| Relation                   | Evidence                                                                                                                                                                                                                                                                             | PMID                  |
|----------------------------|--------------------------------------------------------------------------------------------------------------------------------------------------------------------------------------------------------------------------------------------------------------------------------------|-----------------------|
| "AA" and "heme"            | Interaction of <b>arachidonic acid</b> and <b>heme</b> iron in the synthesis of prostaglandins.                                                                                                                                                                                      | 6770594               |
| "Src" and "heme"           | We found that <b>heme</b> indeed affects the phosphorylation of key tyrosine residues in Jak2 and <b>Src</b> , and is therefore able to modulate Jak2 and Src activity.                                                                                                              | 21036157              |
| "ERK" and "heme"           | The ratio of phospho- <b>ERK</b> : ERK total was weakly modified by the injection of <b>heme</b> in WT mice (...).<br>(...) <b>heme</b> induces Akt phosphorylation and <b>ERK</b> -2 nuclear translocation in neutrophils.                                                          | 33314778,<br>15265937 |
| "FcR $\gamma$ " and "heme" | <b>Heme</b> , a novel endogenous ligand shared by CLEC-2 and GPVI/ <b>FcR<math>\gamma</math></b> , activates human and murine platelets.                                                                                                                                             | 33843987              |
| "myosin" and "heme"        | Oxidation of sulfhydryl (SH) groups was detected in structural proteins (e.g., nebulin, $\alpha$ -actinin, meromyosin 2) and in contractile proteins (e.g., <b>myosin</b> heavy chain and myosin-binding protein C) as well as in titin in the presence of 300 $\mu$ M <b>heme</b> . | 33142923              |
| "PI3K" and "heme"          | Inhibition of ERK and <b>PI3K</b> pathways abolished <b>heme</b> -protective effects upon human neutrophils, suggesting the involvement of the Ras/Raf/MAPK and PI3K pathway on this effect.                                                                                         | 15265937              |
